# Supplementary material for: Neurodevelopmental Delay Diagnosis Rates Are Increased in a Region with Aerial Pesticide Application
Source: PubMed Central journal article supplement (PMC5443159; doi:10.3389/fped.2017.00116), 2017-05-24
Supplement: image_1.pdf [file image_1.pdf]

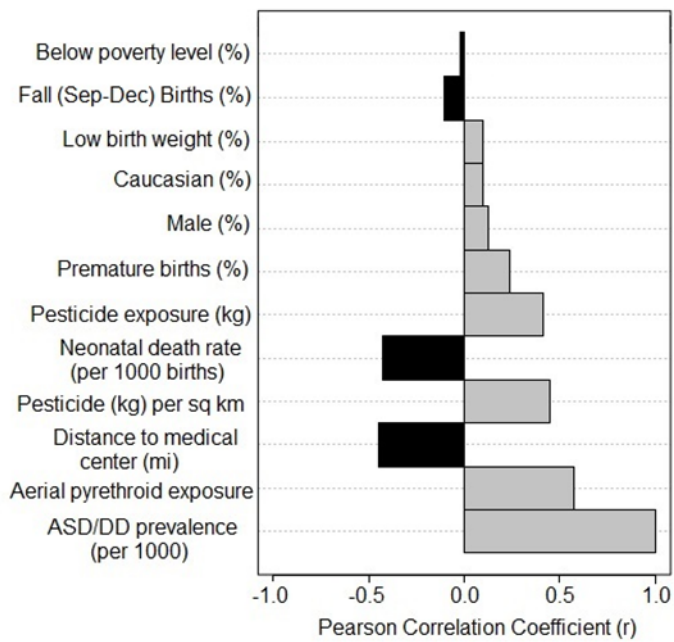

Supplementary Figure 1. Factors correlating with prevalence of autism spectrum disorder (ASD) and developmental delay (DD). The presence of aerial pyrethroid exposure was most strongly correlated with zip code ASD/DD prevalence. Note that zip code distance to the medical center in miles (mi) was more strongly correlated with ASD/DD prevalence ( $r = -0.45$ ) than total pesticide exposure in kilograms (kg) per square kilometer ( $r = 0.41$ ). There was no correlation ( $r = -0.034$ ) between percent of children born in the fall and ASD/DD prevalence, a rough estimate of third trimester to summer aerial pesticide spraying.
